# Supplementary material for: Ionic liquid based battery electrolytes using lithium and sodium pseudo-delocalized pyridinium anion salts
Source: Royal Society of Chemistry journal article supplement (doi:10.1039/c9cp03445e), 2019-01-01
Supplement: c9cp03445e1.pdf [file c9cp03445e1.pdf]

## Electronic Supplementary Information

### Ionic liquid based battery electrolytes by lithium and sodium pseudo-delocalized pyridinium anion salts

Elham Hosseini-Bab-Anari,<sup>a†</sup> Adriana M. Navarro-Suárez,<sup>\*b‡</sup> Kasper Moth-Poulsen,<sup>a</sup> Patrik Johansson<sup>\*b,c</sup>

<sup>a</sup> Department of Chemistry and Chemical engineering, Chalmers University of Technology, SE-412 96 Gothenburg, Sweden

<sup>b</sup> Department of Physics, Chalmers University of Technology, SE-412 96 Gothenburg, Sweden

<sup>c</sup> ALISTORE – European Research Institute, CNRS FR 3104, Hub de l’Energie, 15 Rue Baudelocque, 80039 Amiens, France

\* Corresponding authors: [asuares@chalmers.se](mailto:asuares@chalmers.se), [patrik.johansson@chalmers.se](mailto:patrik.johansson@chalmers.se)

†These authors have contributed equally to this paper.

#### Contents 1

|                                                     |       |
|-----------------------------------------------------|-------|
| 1. NMR spectra                                      | S2-S3 |
| 2. Ion conductivities                               | S4    |
| 2. FTIR band intensities evolution with temperature | S5    |

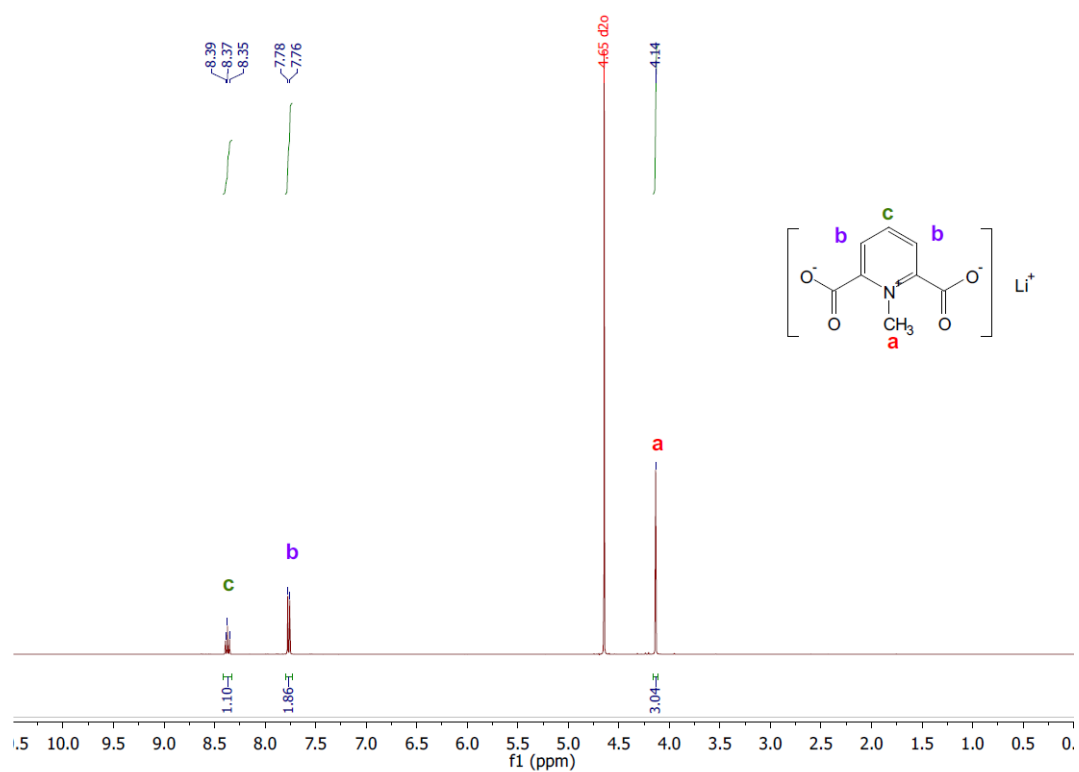

**Fig. S1:** <sup>1</sup>H-NMR of LiMM26py

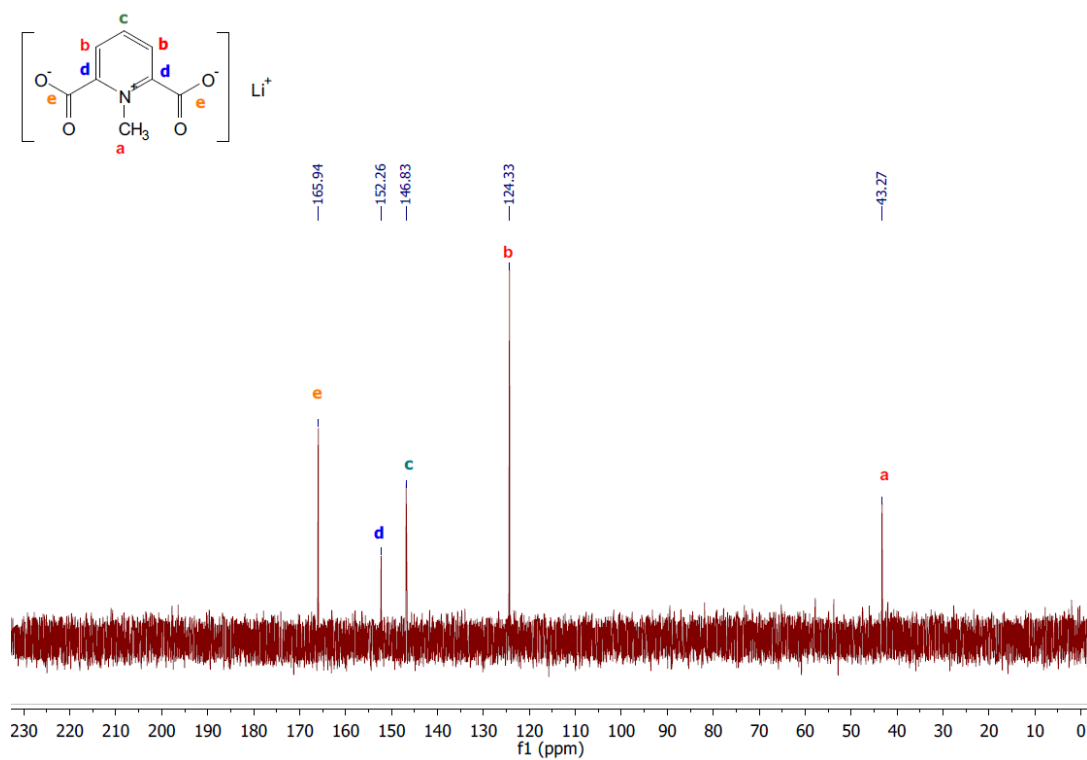

**Fig. S2:** <sup>13</sup>C-NMR of LiMM26py

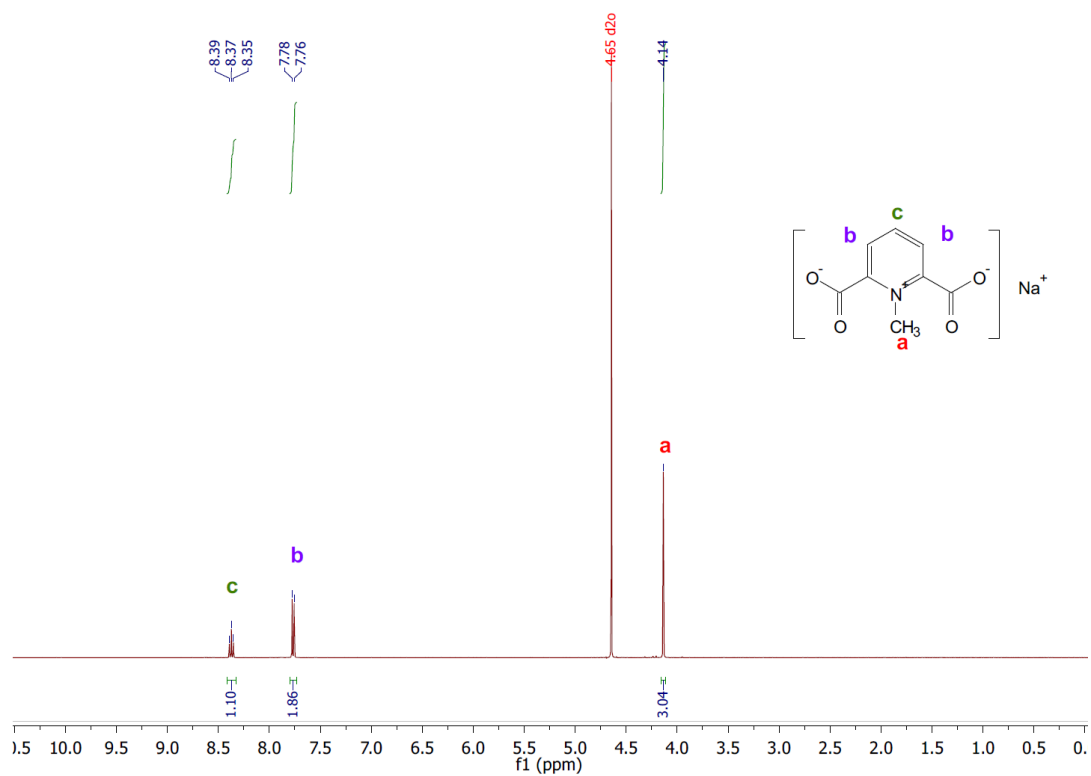

**Fig. S3:**  $^1\text{H-NMR}$  of NaMM26py

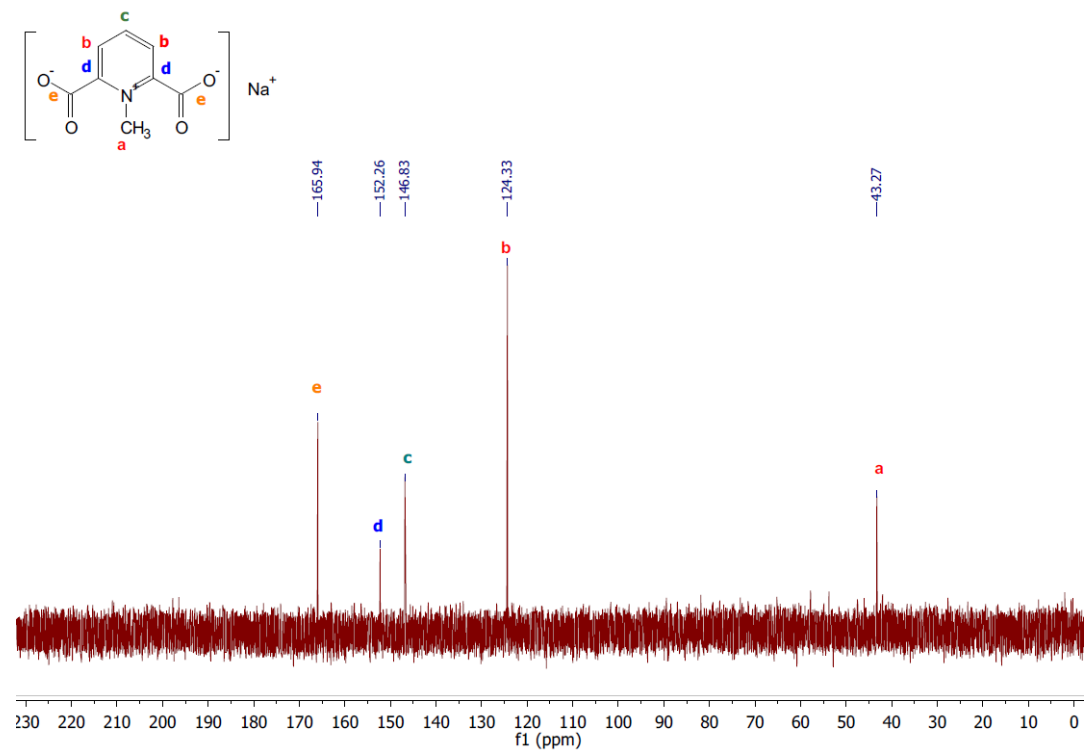

**Fig. S4:**  $^{13}\text{C-NMR}$  of NaMM26py

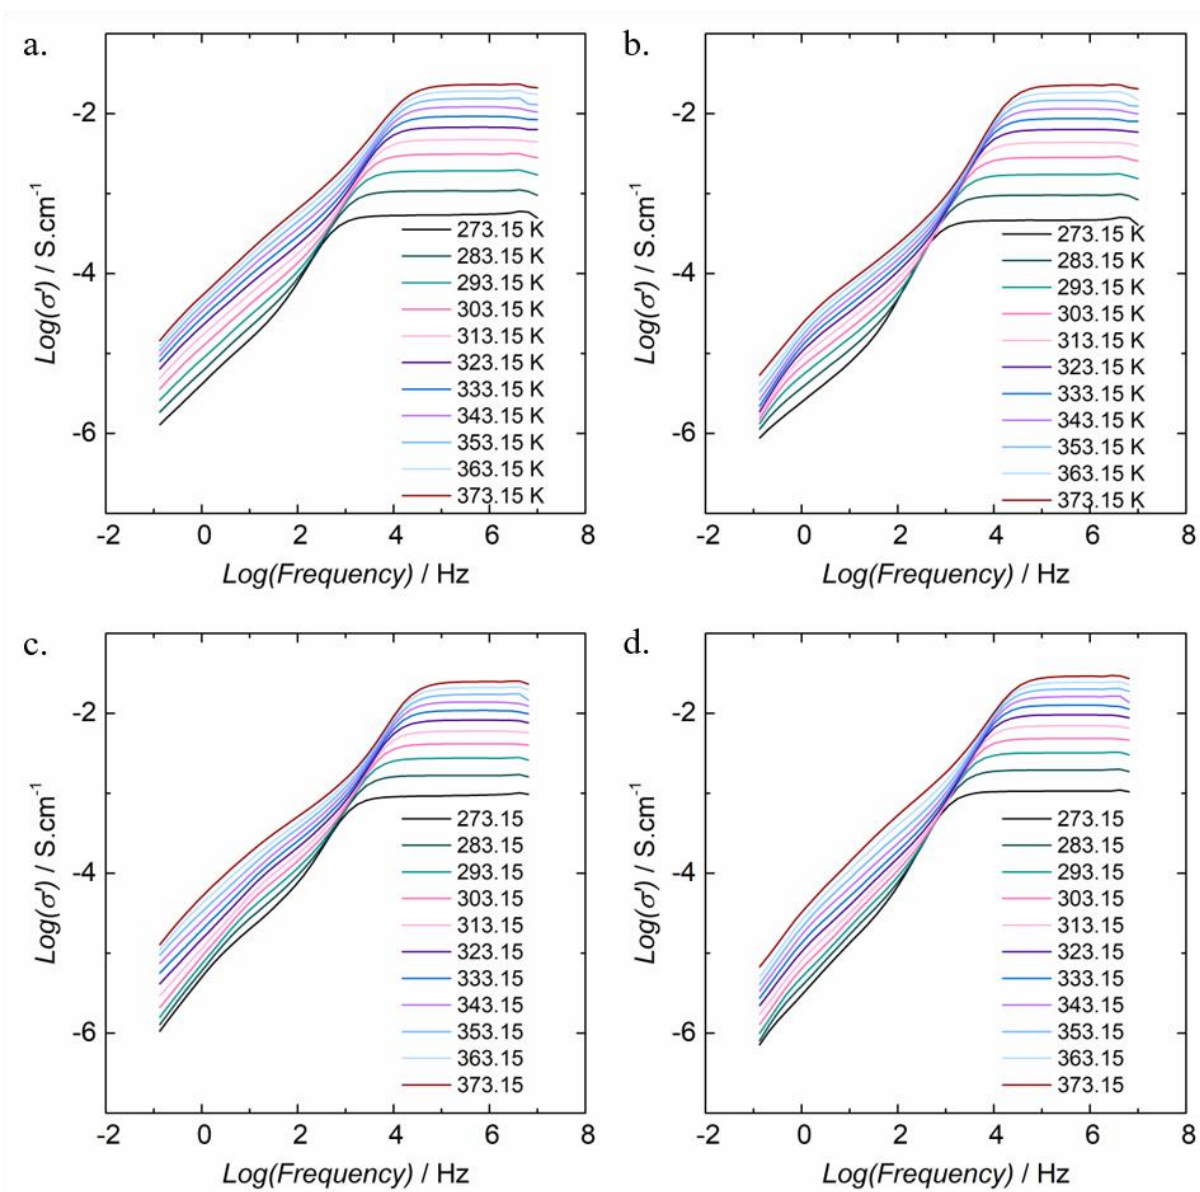

**Fig. S5:** Ion conductivity as a function of frequency at different temperatures of (a)  $[\text{Li}]_{0.1}[\text{Pyr}_{14}]_{0.9}\text{TFSI}$ , (b)  $[\text{Na}]_{0.1}[\text{Pyr}_{14}]_{0.9}\text{TFSI}$ , (c)  $[\text{LiMM26py}]_{0.1}[\text{Pyr}_{14}\text{TFSI}]_{0.9}$ , and (d)  $[\text{NaMM26py}]_{0.1}[\text{Pyr}_{14}\text{TFSI}]_{0.9}$ .

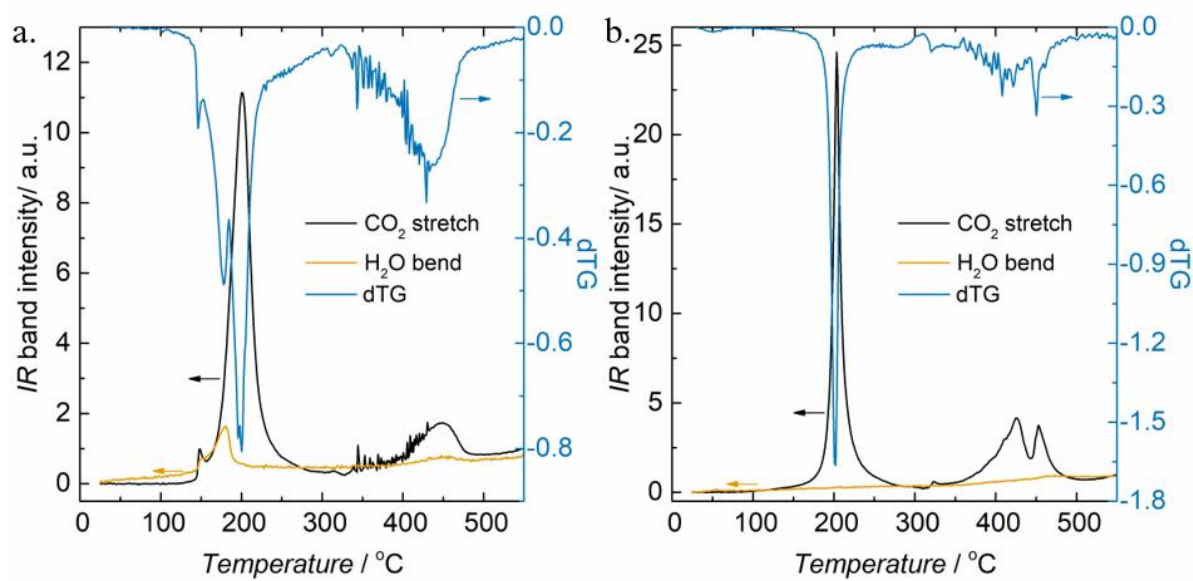

**Fig. S6:** FTIR band intensities evolution with temperature and first derivative of the TGA signal of (a) LiMM26py, and (b) NaMM26py.
